# Supplementary material for: Bridging the Gap: Multi-Omics Profiling of Brain Tissue in Alzheimer’s Disease and Older Controls in Multi-Ethnic Populations
Source: PubMed Central journal article supplement — bioRxiv. 2024 Apr 20:2024.04.16.589592. Preprint. [Version 1] doi: 10.1101/2024.04.16.589592 (PMC11042309; doi:10.1101/2024.04.16.589592), 2024-04-20
Supplement: media-1.pdf [file media-1.pdf]

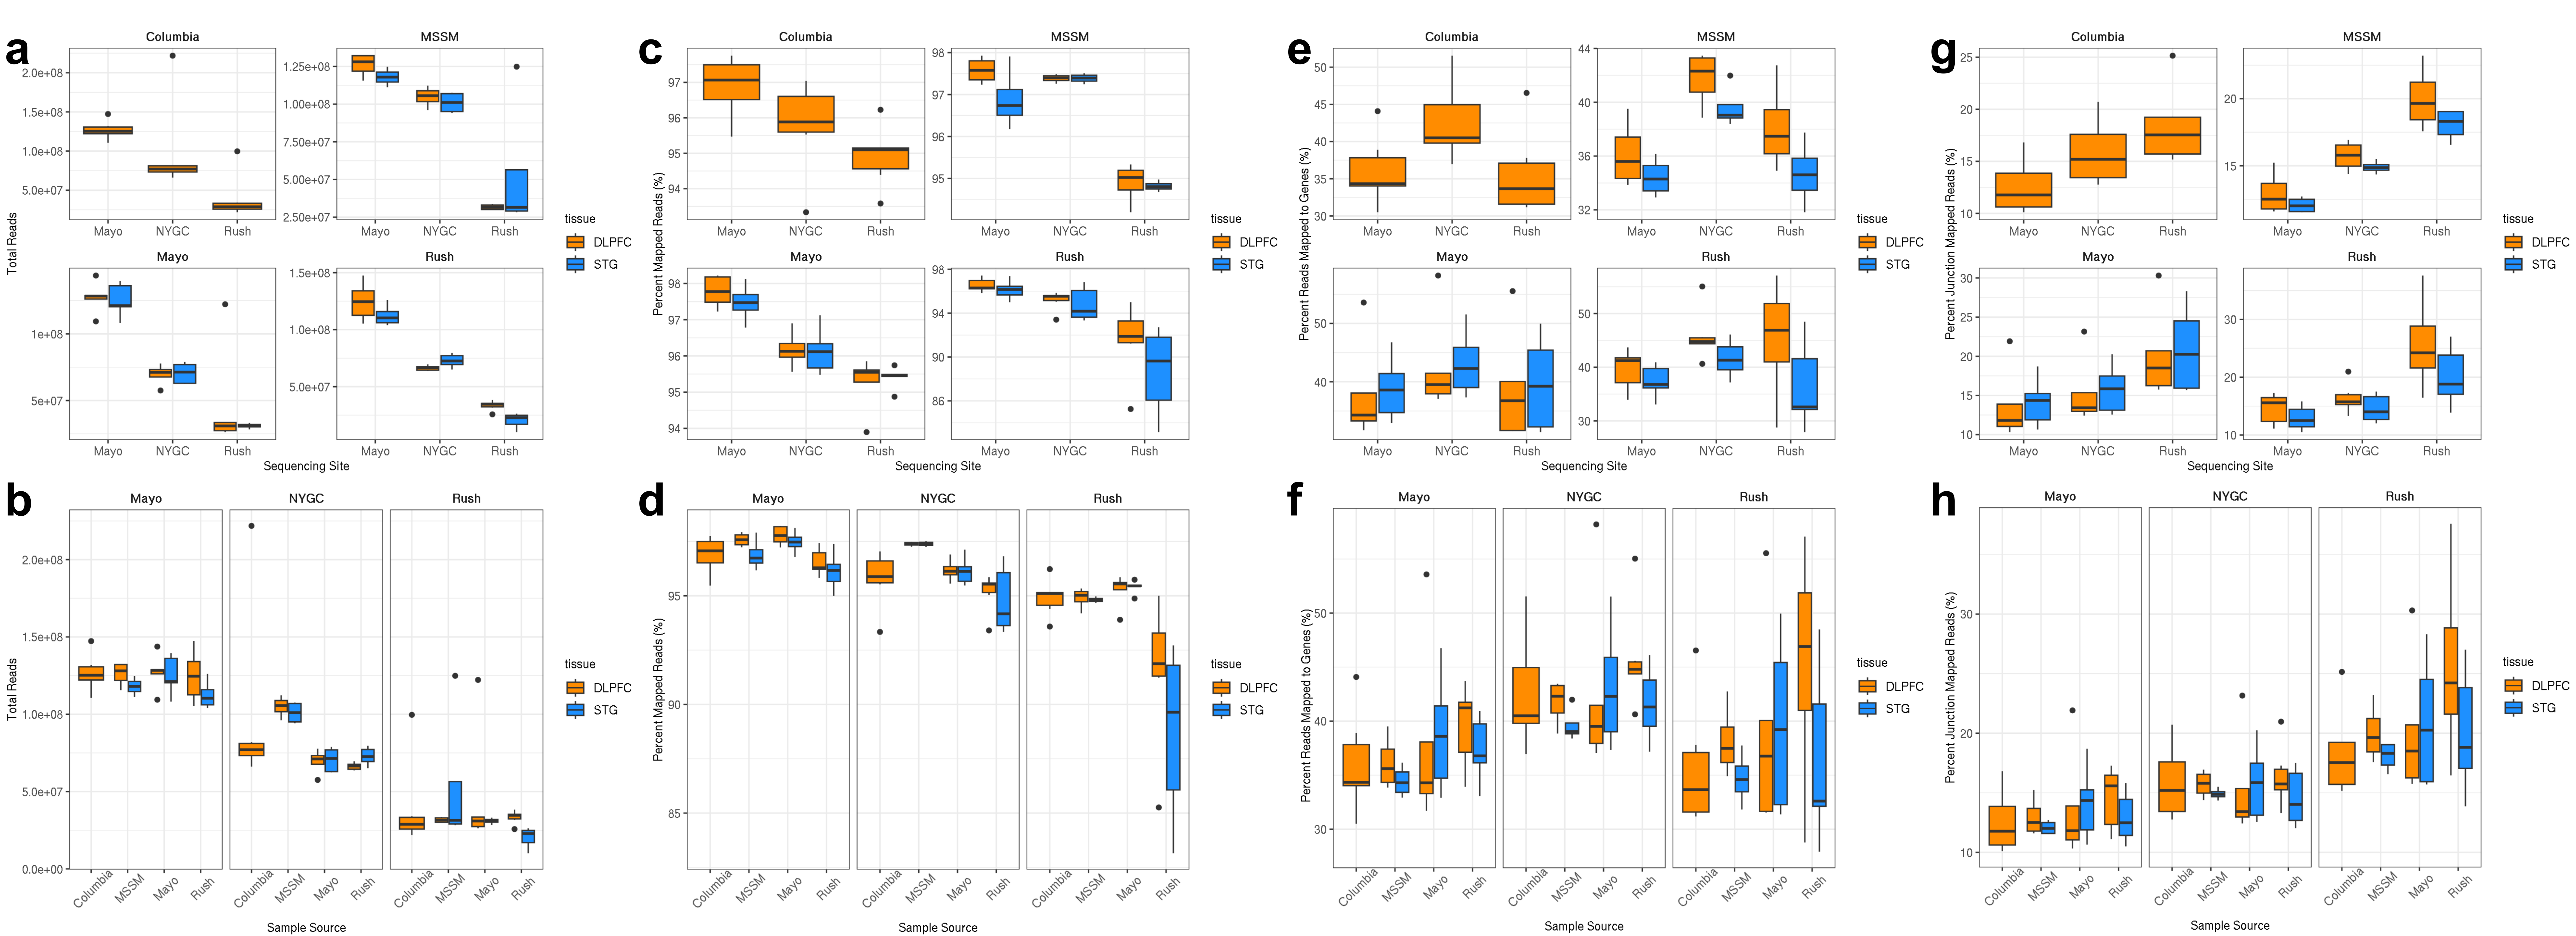

**Supplementary Figure 1. Alignment metrics.** Summaries by tissue sample source (data contribution group) at the top (**a, c, e, g**) and by sequencing site at the bottom (**b, d, f** and **h**) are illustrated for the following metrics: Total reads (**a, b**); percent mapped reads (**c, d**), percent reads mapped to genes (**e, f**) and percent junctions (**g, h**).
